# Supplementary material for: The preparation of a modified PVDF hollow fiber membrane by coating with multiwalled carbon nanotubes for high antifouling performance
Source: Royal Society of Chemistry journal article supplement (doi:10.1039/c9ra07542a), 2020-01-01
Supplement: c9ra07542a1.pdf [file c9ra07542a1.pdf]

## Supporting information

Table S1 Characteristics of the synthetic municipal wastewater used in this study.

| Parameters                      | Concentration(mg/L) |
|---------------------------------|---------------------|
| COD                             | 300~330             |
| NH <sub>4</sub> <sup>+</sup> -N | 32~62               |
| TN                              | 32~62               |
| Phosphate                       | 4.2~7.6             |

Table S2 Physical characteristics of Polyvinylidene fluoride (PVDF) hollow fiber membrane.

| Type                    | 60E0025SA               |
|-------------------------|-------------------------|
| Area                    | 25m <sup>2</sup> /piece |
| Nominal bore ( μm )     | 0.4                     |
| Inner diameter ( mm )   | 1.2                     |
| Outside diameter ( mm ) | 2.8                     |
| Size L×D×H ( mm )       | 1250×30×2000            |

Table S3 Physical characteristics of carboxylated multi-walled carbon nanotubes.

| Diameter | Purity | length | Specific surface area              | EC       | Bulk density          |
|----------|--------|--------|------------------------------------|----------|-----------------------|
| >50nm    | >95%   | <10μm  | >40m <sup>2</sup> ·g <sup>-1</sup> | >100s/cm | 0.18g/cm <sup>3</sup> |

Table S4 UV-visible analysis of percolation and backwashing of tap water by HF-PVDF-CNT membrane filtration over 120 mins

| Filtration (mins) | UV-Vis Absorbance (850nm) | MWCNTmass (mg) |
|-------------------|---------------------------|----------------|
| 10                | 0.004                     | 0.00066        |
| 20                | 0.005                     | 0.00075        |
| 30                | 0.004                     | 0.00066        |
| 40                | 0.001                     | 0.00033        |
| 50                | 0.006                     | 0.00087        |
| 60                | 0.008                     | 0.00108        |
| 70                | 0.01                      | 0.00129        |
| 80                | 0.004                     | 0.00066        |
| 90                | 0.016                     | 0.00192        |
| 100               | 0.015                     | 0.00183        |
| 110               | 0.014                     | 0.00171        |
| 120               | 0.013                     | 0.00162        |
| Backwash          |                           | 0.2007         |

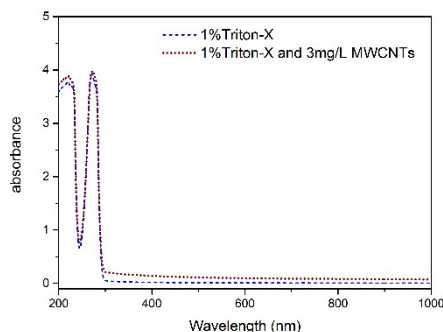

Fig. S1 Absorbance curves of Triton X-100 surfactant and MWCNTs at wavelengths from 200-900nm.

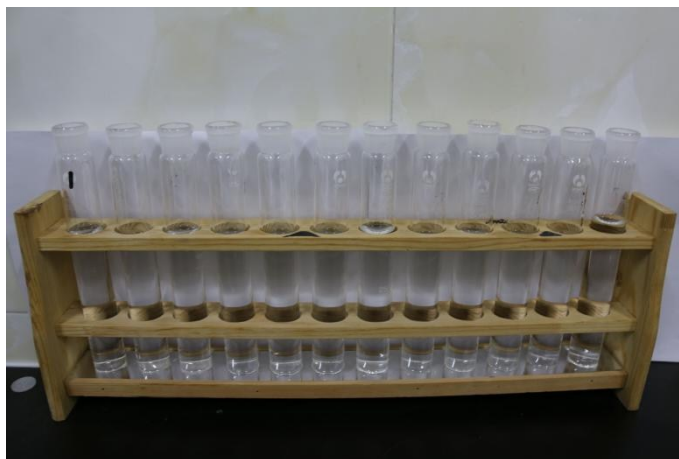

Fig. S2 Image showing all backwash water collected.

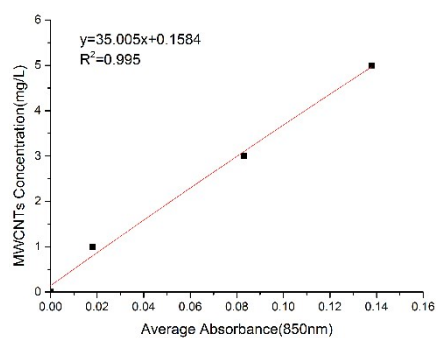

Fig. S3 Standard curve of MWCNT mass concentration based on the average absorbance at 850nm.

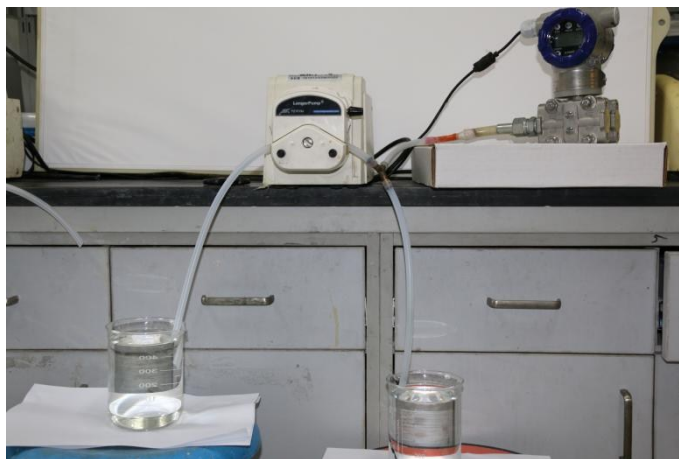

Fig. S4 Filtration procedure used for BSA, SA and HA solutions.

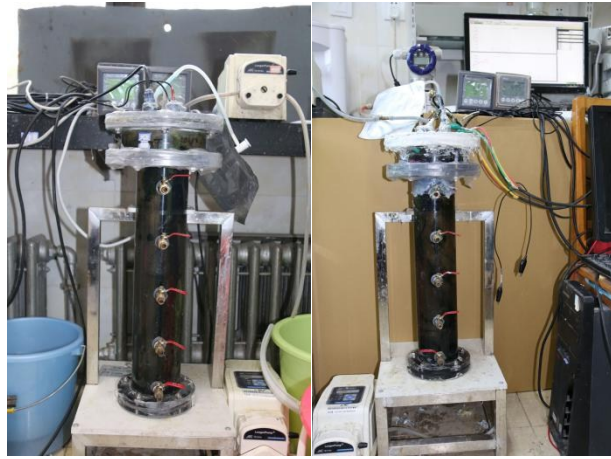

Fig. S5 Physical diagram of R1 (left) and R2 (right).
